# Supplementary material for: Brain size is reduced by selection for tameness in Red Junglefowl– correlated effects in vital organs
Source: PubMed Central journal article supplement (PMC5468340; doi:10.1038/s41598-017-03236-4), 2017-06-12

## **Supplementary Fig 1**

**Brain size is reduced by selection for tameness in  
Red Junglefowl – correlated effects in vital organs**

***Agnvall Beatrix, Bélteky Johan and Jensen Per\****

Supplementary Fig 1. Cull weight (g), relative brain weight (% of body weight), and relative weights of cerebellum and telencephalon (% of brain weight) in males and females from the fifth selected generation of Red Junglefowl (S5).

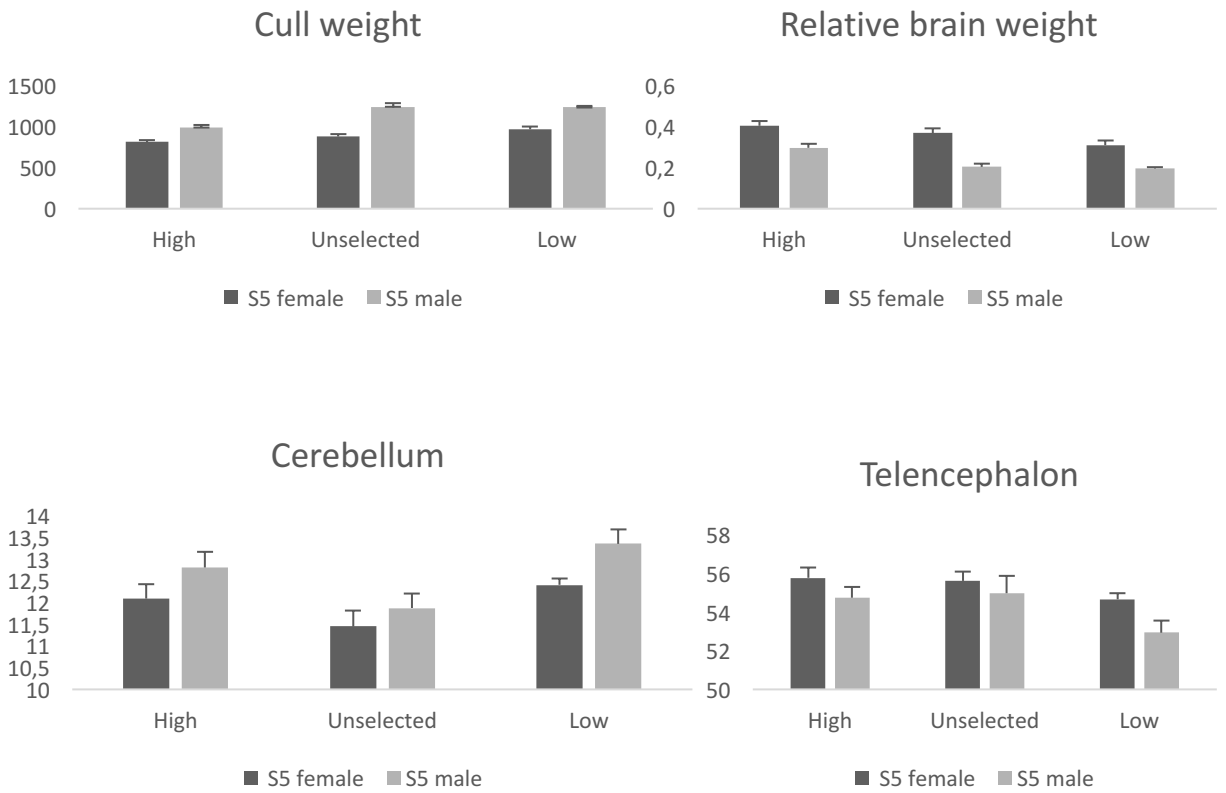

Supplement: 41598_2017_3236_MOESM1_ESM.pdf [file 41598_2017_3236_MOESM1_ESM.pdf]
